# Supplementary material for: Co-management Effects on Forest Restoration in Protected Areas of Bangladesh: A Remote Sensing and GIS-based Analysis
Source: Preprints.org preprint supplement (doi:10.20944/preprints202408.1735.v1), 2024-08-23
Supplement: Supplementary file 1 [file supplementary]

Supplementary Materials

**Table S1.** Quality assessment conditions for each pixel based on QA Pixel quality band.

| QA interpretation | d.q | QA interpretation | d.q | QA interpretation | d.q |
| --- | --- | --- | --- | --- | --- |
| fill | 0 | clear_water_snow | 0 | fill_clear_cloudShadow_cloud_ccMedium | 0 |
| clear | 1 | fill_clear_water_snow | 0 | water_cloudShadow_cloud_ccMedium | 0 |
| fill_clear | 1 | cloudShadow_snow_ccLow | 0 | fill_water_cloudShadow_cloud_ccMedium | 0 |
| water | 1 | fill_cloudShadow_snow_ccLow | 0 | clear_water_cloudShadow_cloud_ccMedium | 0 |
| fill_water | 1 | clear_cloudShadow_snow_ccLow | 0 | fill_clear_water_cloudShadow_cloud_ccMedium | 0 |
| clear_water | 1 | fill_clear_cloudShadow_snow_ccLow | 0 | snow_cloud_ccMedium | 0 |
| fill_clear_water | 1 | water_cloudShadow_snow_ccLow | 0 | fill_snow_cloud_ccMedium | 0 |
| cloudShadow_ccNone | 1 | fill_water_cloudShadow_snow_ccLow | 0 | clear_snow_cloud_ccMedium | 0 |
| fill_cloudShadow_ccNone | 1 | clear_water_cloudShadow_snow_ccLow | 0 | fill_clear_snow_cloud_ccMedium | 0 |
| clear_cloudShadow_ccNone | 1 | fill_clear_water_cloudShadow_snow_ccLow | 0 | water_snow_cloud_ccMedium | 0 |
| fill_clear_cloudShadow_ccNone | 1 | cloud_ccLow | 1 | fill_water_snow_cloud_ccMedium | 0 |
| water_cloudShadow_ccNone | 0 | fill_cloud_ccLow | 1 | clear_water_snow_cloud_ccMedium | 0 |
| fill_water_cloudShadow_ccNone | 0 | clear_cloud_ccLow | 1 | fill_clear_water_snow_cloud_ccMedium | 0 |
| clear_water_cloudShadow_ccNone | 1 | fill_clear_cloud_ccLow | 1 | cloudShadow_snow_cloud_ccMedium | 0 |
| fill_clear_water_cloudShadow_ccNone | 1 | water_cloud_ccLow | 1 | fill_cloudShadow_snow_cloud_ccMedium | 0 |
| snow | 0 | fill_water_cloud_ccLow | 1 | clear_cloudShadow_snow_cloud_ccMedium | 0 |
| fill_snow | 0 | clear_water_cloud_ccLow | 1 | fill_clear_cloudShadow_snow_cloud_ccMedium | 0 |
| clear_snow | 0 | fill_clear_water_cloud_ccLow | 1 | water_cloudShadow_snow_cloud_ccMedium | 0 |
| fill_clear_snow | 0 | cloudShadow_cloud_ccLow | 0 | fill_water_cloudShadow_snow_cloud_ccMedium | 0 |
| water_snow | 0 | fill_cloudShadow_cloud_ccLow | 0 | clear_water_cloudShadow_snow_cloud | 0 |
| fill_water_snow | 0 | clear_cloudShadow_cloud_ccLow | 1 | fill_clear_water_cloudShadow_snow_cloud_ccMedium | 0 |
| clear_water_snow | 0 | fill_clear_cloudShadow_cloud_ccLow | 1 | ccHigh | 0 |
| fill_clear_water_snow | 0 | water_cloudShadow_cloud_ccLow | 0 | fill_ccHigh | 0 |
| cloudShadow_snow_ccNone | 0 | fill_water_cloudShadow_cloud_ccLow | 0 | clear_ccHigh | 1 |
| fill_cloudShadow_snow_ccNone | 0 | clear_water_cloudShadow_cloud_ccLow | 1 | fill_clear_ccHigh | 1 |
| clear_cloudShadow_snow_ccNone | 0 | fill_clear_water_cloudShadow_cloud_ccLow | 1 | water_ccHigh | 0 |
| fill_clear_cloudShadow_snow_ccNone | 0 | snow_cloud_ccLow | 0 | fill_water_ccHigh | 0 |
| water_cloudShadow_snow_ccNone | 0 | fill_snow_cloud_ccLow | 0 | clear_water_ccHigh | 1 |
| fill_water_cloudShadow_snow_ccNone | 0 | clear_snow_cloud_ccLow | 0 | fill_clear_water_ccHigh | 1 |
| clear_water_cloudShadow_snow_ccNone | 0 | fill_clear_snow_cloud_ccLow | 0 | cloudShadow_ccHigh | 0 |
| fill_clear_water_cloudShadow_snow_ccNone | 0 | water_snow_cloud_ccLow | 0 | fill_cloudShadow_ccHigh | 0 |
| cloud_ccNone | 1 | fill_water_snow_cloud_ccLow | 0 | clear_cloudShadow_ccHigh | 0 |
| fill_cloud_ccNone | 1 | clear_water_snow_cloud_ccLow | 0 | fill_clear_cloudShadow_ccHigh | 0 |
| clear_cloud_ccNone | 1 | fill_clear_water_snow_cloud_ccLow | 0 | water_cloudShadow_ccHigh | 0 |
| fill_clear_cloud_ccNone | 1 | cloudShadow_snow_cloud_ccLow | 0 | fill_water_cloudShadow_ccHigh | 0 |
| water_cloud_ccNone | 1 | fill_cloudShadow_snow_cloud_ccLow | 0 | clear_water_cloudShadow_ccHigh | 0 |
| fill_water_cloud_ccNone | 1 | clear_cloudShadow_snow_cloud_ccLow | 0 | fill_clear_water_cloudShadow_ccHigh | 0 |
| clear_water_cloud_ccNone | 1 | fill_clear_cloudShadow_snow_cloud_ccLow | 0 | snow_ccHigh | 0 |
| fill_clear_water_cloud_ccNone | 1 | water_cloudShadow_snow_cloud_ccLow | 0 | fill_snow_ccHigh | 0 |
| cloudShadow_cloud_ccNone | 0 | fill_water_cloudShadow_snow_cloud_cloudConf | 0 | clear_snow_ccHigh | 0 |
| fill_cloudShadow_cloud_ccNone | 0 | clear_water_cloudShadow_snow_cloud_ccLow | 0 | fill_clear_snow_ccHigh | 0 |
| clear_cloudShadow_cloud_ccNone | 1 | fill_clear_water_cloudShadow_snow_cloud_ccLow | 0 | water_snow_ccHigh | 0 |
| fill_clear_cloudShadow_cloud_ccNone | 1 | ccMedium | 0 | fill_water_snow_ccHigh | 0 |
| water_cloudShadow_cloud_ccNone | 0 | fill_ccMedium | 0 | clear_water_snow_ccHigh | 0 |
| fill_water_cloudShadow_cloud_ccNone | 0 | clear_ccMedium | 1 | fill_clear_water_snow_ccHigh | 0 |
| clear_water_cloudShadow_cloud_ccNone | 1 | fill_clear_ccMedium | 1 | cloudShadow_snow_ccHigh | 0 |
| fill_clear_water_cloudShadow_cloud_ccNone | 1 | water_ccMedium | 0 | fill_cloudShadow_snow_ccHigh | 0 |
| snow_cloud_ccNone | 0 | fill_water_ccMedium | 0 | clear_cloudShadow_snow_ccHigh | 0 |
| fill_snow_cloud_ccNone | 0 | clear_water_ccMedium | 1 | fill_clear_cloudShadow_snow_ccHigh | 0 |
| clear_snow_cloud_ccNone | 0 | fill_clear_water_ccMedium | 1 | water_cloudShadow_snow_ccHigh | 0 |
| fill_clear_snow_cloud_ccNone | 0 | cloudShadow_ccMedium | 0 | fill_water_cloudShadow_snow_ccHigh | 0 |
| water_snow_cloud_ccNone | 0 | fill_cloudShadow_ccMedium | 0 | clear_water_cloudShadow_snow_ccHigh | 0 |
| fill_water_snow_cloud_ccNone | 0 | clear_cloudShadow_ccMedium | 0 | fill_clear_water_cloudShadow_snow_ccHigh | 0 |
| clear_water_snow_cloud_ccNone | 0 | fill_clear_cloudShadow_ccMedium | 0 | cloud_ccHigh | 0 |
| fill_clear_water_snow_cloud_ccNone | 0 | water_cloudShadow_ccMedium | 0 | fill_cloud_ccHigh | 0 |
| cloudShadow_snow_cloud_ccNone | 0 | fill_water_cloudShadow_ccMedium | 0 | clear_cloud_ccHigh | 0 |
| fill_cloudShadow_snow_cloud_ccNone | 0 | clear_water_cloudShadow_ccMedium | 0 | fill_clear_cloud_ccHigh | 0 |
| clear_cloudShadow_snow_cloud_ccNone | 0 | fill_clear_water_cloudShadow_ccMedium | 0 | water_cloud_ccHigh | 0 |
| fill_clear_cloudShadow_snow_cloud_ccNone | 0 | snow_ccMedium | 0 | fill_water_cloud_ccHigh | 0 |
| water_cloudShadow_snow_cloud_ccNone | 0 | fill_snow_ccMedium | 0 | clear_water_cloud_ccHigh | 0 |
| fill_water_cloudShadow_snow_cloud_ccNone | 0 | clear_snow_ccMedium | 0 | fill_clear_water_cloud_ccHigh | 0 |
| clear_water_cloudShadow_snow_cloud_ccNone | 0 | fill_clear_snow_ccMedium | 0 | cloudShadow_cloud_ccHigh | 0 |
| fill_clear_water_cloudShadow_snow_cloud_ccNone | 0 | water_snow_ccMedium | 0 | fill_cloudShadow_cloud_ccHigh | 0 |
| ccLow | 1 | fill_water_snow_ccMedium | 0 | clear_cloudShadow_cloud_ccHigh | 0 |
| fill_ccLow | 1 | clear_water_snow_ccMedium | 0 | fill_clear_cloudShadow_cloud_ccHigh | 0 |
| clear_ccLow | 1 | fill_clear_water_snow_ccMedium | 0 | water_cloudShadow_cloud_ccHigh | 0 |
| fill_clear_ccLow | 1 | cloudShadow_snow_ccMedium | 0 | fill_water_cloudShadow_cloud_ccHigh | 0 |
| water_ccLow | 1 | fill_cloudShadow_snow_ccMedium | 0 | clear_water_cloudShadow_cloud_ccHigh | 0 |
| fill_water_ccLow | 1 | clear_cloudShadow_snow_ccMedium | 0 | fill_clear_water_cloudShadow_cloud_ccHigh | 0 |
| clear_water_ccLow | 1 | fill_clear_cloudShadow_snow_ccMedium | 0 | snow_cloud_ccHigh | 0 |
| fill_clear_water_ccLow | 1 | water_cloudShadow_snow_ccMedium | 0 | fill_snow_cloud_ccHigh | 0 |
| cloudShadow_ccLow | 0 | fill_water_cloudShadow_snow_ccMedium | 0 | clear_snow_cloud_ccHigh | 0 |
| fill_cloudShadow_ccLow | 0 | clear_water_cloudShadow_snow_ccMedium | 0 | fill_clear_snow_cloud_ccHigh | 0 |
| clear_cloudShadow_ccLow | 1 | fill_clear_water_cloudShadow_snow_ccMedium | 0 | water_snow_cloud_ccHigh | 0 |
| fill_clear_cloudShadow_ccLow | 1 | cloud_ccMedium | 0 | fill_water_snow_cloud_ccHigh | 0 |
| water_cloudShadow_ccLow | 0 | fill_cloud_ccMedium | 0 | clear_water_snow_cloud_ccHigh | 0 |
| fill_water_cloudShadow_ccLow | 0 | clear_cloud_ccMedium | 1 | fill_clear_water_snow_cloud_ccHigh | 0 |
| clear_water_cloudShadow_ccLow | 1 | fill_clear_cloud_ccMedium | 1 | cloudShadow_snow_cloud_ccHigh | 0 |
| fill_clear_water_cloudShadow_ccLow | 1 | water_cloud_ccMedium | 0 | fill_cloudShadow_snow_cloud_ccHigh | 0 |
| snow | 0 | fill_water_cloud_ccMedium | 0 | clear_cloudShadow_snow_cloud_ccHigh | 0 |
| fill_snow | 0 | clear_water_cloud_ccMedium | 0 | fill_clear_cloudShadow_snow_cloud_ccHigh | 0 |
| clear_snow | 0 | fill_clear_water_cloud_ccMedium | 0 | water_cloudShadow_snow_cloud_ccHigh | 0 |
| fill_clear_snow | 0 | cloudShadow_cloud_ccMedium | 0 | fill_water_cloudShadow_snow_cloud_ccHigh | 0 |
| water_snow | 0 | fill_cloudShadow_cloud_ccMedium | 0 | clear_water_cloudShadow_snow_cloud_ccHigh | 0 |
| fill_water_snow | 0 | clear_cloudShadow_cloud_ccMedium | 0 | fill_clear_water_cloudShadow_snow_cloud_ccHigh | 0 |

***Notes:** “_” = and, dq = Desired quality of pixel, cloudShadow = Cloud shadow confidence, ccHigh = Cloud confidence high, ccMedium = Cloud confidence medium, ccLow = Cloud confidence low, ccNone = No cloud confidence, cloud = Cloud in pixel snow = snow/ice confidence, clear = Clear terrain, fill = Designated fill, water = Waterbody. Here the desired quality value “0” means this condition did not exist and “1” means this condition exists in our case (Table 2).
